# Supplementary material for: Coalbed Methane Enrichment Regularity and Model in the Xishanyao Formation in the Santanghu Basin, NW China
Source: MDPI journal article supplement (doi:10.3390/min13111369), 2023-10-26
Supplement: s1 [file s1]

**Table S1.** Statistical data of contour maps of coal seam thickness and burial depth (Well information is from Research Institute of Exploration and Development, Petro China Tuha Oilfield Company, and the data are statistics for this study).

| Well ID     | Coal seam thickness(m) | Coal seam burial depth(m) |
|-------------|------------------------|---------------------------|
| Tiao 15     | 13.08                  | 877.5                     |
| Tiao 11     | 42.3                   | 1420                      |
| Tiao 18     | 30.5                   | 1670                      |
| Tiao 26     | 13.3                   | 1650                      |
| Ma 76       | 44.66                  | 1861                      |
| Ma 18       | 20                     | 1177                      |
| Ma 37       | 52                     | 988                       |
| Ma 19       | 24.6                   | 1247                      |
| Ma 51       | 61.3                   | 1520                      |
| Ma 53       | 41                     | 1450                      |
| Tang 1      | 46.9                   | 1034.4                    |
| Ma 20       | 20                     | 1200                      |
| Bei 2       | 38.8                   | 1964                      |
| L5-2        | 6.5                    | 280                       |
| 310-1       | 4.2                    | 380                       |
| 340-3       | 3.7                    | 270                       |
| Tangqican 1 | 40.03                  | 723                       |

**Table S2.** Maceral compositions of the coals in the Xishanyao Formation of the Santanghu Basin (Data from Research Institute of Exploration and Development, Petro China Tuha Oilfield Company, the data with \* in Well ID are the results of this study).

| Well ID           | Depth (m)    | Maceral compositions (%) |            |           | $R_{o,ran}$ |
|-------------------|--------------|--------------------------|------------|-----------|-------------|
|                   |              | Vitrinite                | Inertinite | Liptinite |             |
| <b>Tangqican1</b> | <b>722.4</b> | <b>41</b>                | <b>59</b>  | <b>0</b>  |             |
| Tangqican1        | 723.91       | 34                       | 52         | 14        | 0.59        |
| Tangqican1        | 724.73       | 22                       | 78         | 0         |             |
| Tangqican1        | 726.54       | 33                       | 67         | 0         |             |
| Tangqican1        | 728.28       | 46                       | 54         | 0         | 0.66        |
| Tangqican1        | 728.6        | 40                       | 60         | 0         |             |
| Tangqican1        | 728.79       | 49                       | 51         | 0         |             |
| Tangqican1        | 729.18       | 36                       | 50         | 14        |             |
| Tangqican1        | 729.88       | 52                       | 48         | 0         |             |
| Tangqican1        | 729.98       | 25                       | 63         | 12        |             |
| Tangqican1        | 730.16       | 32                       | 55         | 13        |             |
| Tangqican1        | 730.75       | 63                       | 37         | 0         |             |
| Tangqican1        | 731.6        | 57                       | 43         | 0         |             |
| Tangqican1        | 735.83       | 43                       | 57         | 0         |             |
| Tangqican1        | 737.53       | 27                       | 58         | 15        |             |
| Tangqican1        | 738.22       | 46                       | 54         | 0         |             |
| Tangqican1        | 738.78       | 42                       | 58         | 0         |             |
| Tangqican1        | 739.35       | 52                       | 48         | 0         |             |
| Tangqican1        | 740.7        | 65                       | 35         | 0         | 0.57        |
| Tangqican1        | 740.88       | 58                       | 42         | 0         |             |

|            |                 |      |      |     |      |
|------------|-----------------|------|------|-----|------|
| Tangqican1 | 741.06          | 51   | 49   | 0   |      |
| Tangqican1 | 741.25          | 63   | 37   | 0   | 0.56 |
| Tangqican1 | 741.42          | 60   | 40   | 0   |      |
| Tangqican1 | 741.83          | 57   | 43   | 0   |      |
| Tangqican1 | 741.99          | 53   | 47   | 0   |      |
| Tangqican1 | 742.4           | 68   | 32   | 0   |      |
| Tangqican1 | 742.75          | 58   | 42   | 0   |      |
| Tangqican1 | 742.92          | 51   | 49   | 0   |      |
| Tangqican1 | 743.19          | 55   | 45   | 0   |      |
| Tangqican1 | 743.36          | 30   | 59   | 11  | 0.53 |
| Tangqican1 | 743.7           | 66   | 34   | 0   |      |
| Tangqican1 | 745.75          | 71   | 29   | 0   |      |
| Tangqican1 | 746.39          | 65   | 35   | 0   |      |
| Tangqican1 | 746.75          | 57   | 43   | 0   |      |
| Tangqican1 | 746.98          | 30   | 62   | 8   | 0.61 |
| Tangqican1 | 747.28          | 60   | 40   | 0   |      |
| Tangqican1 | 747.43          | 73   | 27   | 0   |      |
| Tangqican1 | 748.26          | 54   | 46   | 0   |      |
| Tangqican1 | 749.79          | 26   | 46   | 28  |      |
| Tangqican1 | 757.06          | 39   | 61   | 0   | 0.74 |
| Tang 1*    | 991.57-992.31   | 36.4 | 59   | 4.6 | 0.51 |
| Tang1      | 994.00-994.35   | 12.6 | 87.4 | 0.0 | 0.48 |
| Tang1      | 998.10-998.45   | 27.2 | 72.8 | 0.0 | 0.48 |
| Tang1      | 1002.2          | 38.4 | 58.4 | 3.2 |      |
| Tang1      | 1004.00-1004.35 | 15.1 | 84.9 | 0.0 | 0.49 |
| Tang 1*    | 1008.01-1009.63 | 44.2 | 53.9 | 1.9 | 0.36 |
| Tang1      | 1012.43-1012.45 | 33.0 | 62.0 | 5.0 |      |
| Tang 1*    | 1017.74-1019.46 | 45.3 | 52.9 | 1.8 | 0.24 |
| Tang 1     | 1020.8          | 38.4 | 56.3 | 5.3 | 0.54 |
| Tang 1     | 1024.5          | 35   | 63.7 | 1.3 | 0.55 |
| Tang1      | 1026.78-1027.13 | 71.0 | 28.5 | 0.5 | 0.42 |
| Tang3      | 1186.3          | 90   | 8    | 2   | 0.57 |
| Bei2       | 1966.2          | 30   | 64   | 6   | 0.61 |
| Tiao15     | 843.72--844.01  | 43.9 | 54.6 | 1.5 | 0.39 |
| Tiao15     | 844.73--845.00  | 41   | 58.5 | 0.5 | 0.44 |
| Tiao15     | 846.56-846.58   | 46   | 47   | 7   |      |
| Tiao15     | 846.80--847.10  | 42.3 | 55.1 | 2.6 | 0.46 |
| Tiao15     | 847.10--847.40  | 42.1 | 57.3 | 0.5 | 0.45 |
| Tiao15     | 847.40--847.70  | 39.3 | 60.3 | 0.4 | 0.44 |
| Tiao15     | 847.70--848.00  | 38.1 | 61.2 | 0.7 | 0.45 |
| Tiao15     | 848.00--848.26  | 30.2 | 68.7 | 1.1 | 0.45 |
| Tiao15     | 848.41--848.69  | 26   | 73   | 1   | 0.46 |
| Tiao15     | 848.69--848.86  | 32.7 | 66.4 | 0.8 | 0.42 |
| Tiao15     | 848.98--849.10  | 38.1 | 61   | 0.9 | 0.41 |
| Tiao15     | 849.10--849.31  | 37.5 | 61.8 | 0.7 | 0.41 |
| Tiao15     | 851.06--851.20  | 59.2 | 39.5 | 1.3 | 0.45 |
| Tiao15     | 851.20--851.46  | 65.4 | 34.3 | 0.4 | 0.45 |
| Tiao15     | 851.46--851.71  | 67.9 | 31.2 | 0.9 | 0.44 |
| Tiao15     | 851.71--851.93  | 67.9 | 30.7 | 1.4 | 0.46 |
| Ma205      | 768.85-768.88   | 46   | 44   | 10  | 0.38 |
| Ma76       | 1800.4          | 60.1 | 34.4 | 5.5 | 0.62 |

**Table S3.** Results of the partial proximate analysis of the coals in the Xishanyao Formation of the Santanghu Basin (Data from Research Institute of Exploration and Development, Petro China Tuha Oilfield Company, the data with \* in Well ID are the results of this study).

| Well ID     | Depth/m       | Proximate analysis (%) |                   |                     |                     |
|-------------|---------------|------------------------|-------------------|---------------------|---------------------|
|             |               | M <sub>ad</sub> /%     | A <sub>d</sub> /% | V <sub>daf</sub> /% | FC <sub>ad</sub> /% |
| Tangqican1  | 722.29-722.49 | 6.42                   | 3.61              | 31.76               | 61.55               |
| Tangqican1  | 724.66-724.81 | 8.96                   | 19.88             | 47.14               | 38.56               |
| Tangqican1  | 726.49-726.59 | 13.48                  | 4.1               | 38.04               | 51.41               |
| Tangqican1  | 728.20-728.37 | 15.15                  | 3.18              | 31.14               | 56.57               |
| Tangqican1  | 728.52-728.69 | 15.32                  | 5.17              | 37.97               | 49.81               |
| Tangqican1  | 728.69-728.89 | 5.44                   | 14.23             | 49.93               | 40.61               |
| Tangqican1  | 729.13-729.22 | 14.42                  | 5.04              | 38                  | 50.39               |
| Tangqican1  | 729.84-729.93 | 8.87                   | 34.74             | 42.36               | 34.28               |
| Tangqican1  | 729.93-730.03 | 10.59                  | 7.34              | 33.66               | 54.96               |
| Tangqican1  | 730.03-730.29 | 6.14                   | 3.67              | 34.47               | 59.25               |
| Tangqican1  | 730.71-730.78 | 9.2                    | 36.97             | 48.33               | 29.57               |
| Tangqican1  | 731.51-731.69 | 12.02                  | 3.07              | 37.98               | 52.89               |
| Tangqican1  | 735.71-735.95 | 5.14                   | 28.69             | 53.3                | 31.59               |
| Tangqican1  | 737.43-737.63 | 10.67                  | 6.94              | 36.53               | 52.76               |
| Tangqican1  | 738.13-738.30 | 7.79                   | 13.64             | 41.07               | 46.93               |
| Tangqican1  | 738.69-738.86 | 8.08                   | 7.03              | 34.85               | 55.68               |
| Tangqican1  | 739.26-739.43 | 6.02                   | 20.44             | 44.68               | 41.37               |
| Tangqican1  | 739.43-739.60 | 8.34                   | 7.7               | 35.75               | 54.36               |
| Tangqican1  | 740.62-740.79 | 8.3                    | 10.34             | 34.55               | 53.81               |
| Tangqican1  | 740.79-740.96 | 8.5                    | 9.14              | 40.01               | 49.88               |
| Tangqican1  | 740.96-741.16 | 9.78                   | 5.22              | 39.25               | 51.95               |
| Tangqican1  | 741.16-741.33 | 8.2                    | 21.46             | 38.21               | 44.55               |
| Tangqican1  | 741.73-741.93 | 5.95                   | 3.64              | 35.92               | 58.08               |
| Tangqican1  | 742.32-742.49 | 7.08                   | 27.84             | 38.22               | 41.43               |
| Tangqican1  | 742.49-742.66 | 7.08                   | 26.88             | 38.92               | 41.5                |
| Tangqican1  | 742.66-742.83 | 8.12                   | 16.21             | 37.62               | 48.03               |
| Tangqican1  | 742.83-743.00 | 8.64                   | 6.35              | 34.55               | 56                  |
| Tangqican1  | 743.11-743.28 | 8.32                   | 8.62              | 34.98               | 54.47               |
| Tangqican1  | 743.45-743.62 | 7.72                   | 13.01             | 38.16               | 49.64               |
| Tangqican1  | 743.62-743.79 | 8.11                   | 13.47             | 38.9                | 48.58               |
| Tangqican1  | 745.66-745.84 | 6.44                   | 4.26              | 35.81               | 57.5                |
| Tangqican1  | 746.14-746.31 | 9.98                   | 3.95              | 35.74               | 55.56               |
| Tangqican1  | 746.31-746.48 | 9.22                   | 9                 | 37.48               | 51.65               |
| Tangqican1  | 746.65-746.82 | 10.04                  | 3.69              | 33.64               | 57.49               |
| Tangqican1  | 746.82-746.90 | 7.42                   | 6.63              | 37.95               | 53.64               |
| Tangqican1  | 747.35-747.52 | 7.64                   | 7.23              | 38.18               | 52.97               |
| Tangqican1  | 748.18-748.35 | 7.54                   | 12.91             | 34.91               | 52.41               |
| Tangqican1  | 749.71-749.88 | 7.78                   | 16.09             | 36.96               | 48.78               |
| Tangqican1  | 749.88-750.00 | 8.32                   | 6.48              | 36.25               | 54.66               |
| Tangqican1  | 756.99-757.14 | 10.26                  | 19.91             | 36.41               | 45.71               |
| Tangqican1* | 721.84-726.72 | 6.06                   | 10.99             | 32.24               | 56.65               |
| Tangqican1* | 727.49-733.78 | 5.22                   | 5.72              | 38.31               | 55.12               |
| Tangqican1* | 734.69-739.03 | 5.05                   | 5.29              | 33.48               | 59.82               |
| Tangqican1* | 739.03-743.96 | 4.34                   | 21.39             | 44.53               | 41.71               |
| Tangqican1* | 744.57-748.03 | 4.78                   | 5.68              | 34.69               | 58.66               |
| Tangqican1* | 755.65-757.38 | 4.72                   | 21.35             | 37.73               | 46.66               |
| Tang1*      | 991.57-992.31 | 4.32                   | 2.73              | 30.96               | 64.25               |

|        |                 |      |       |       |       |
|--------|-----------------|------|-------|-------|-------|
| Tang1  | 993.40-993.42   | 7.59 | 2.86  | 27.23 | 65.33 |
| Tang1  | 998.10-998.45   | 2.89 | 2.35  | 32.68 | 62.09 |
| Tang1* | 1000.46-1001.79 | 4.42 | 3.34  | 30.04 | 64.63 |
| Tang1  | 1005.8          | 5.43 | 1.78  | 26.66 | 66.14 |
| Tang1  | 1007.9          | 4.84 | 3.01  | 37.15 | 55.01 |
| Tang1  | 1013.95-1014.30 | 3.01 | 2.4   | 28.37 | 66.23 |
| Tang1* | 1017.74-1019.46 | 3.82 | 2.71  | 32.16 | 63.47 |
| Tang1  | 1026.78-1027.13 | 1.79 | 5.25  | 37.59 | 55.38 |
| Tang3  | 1186.30-1186.32 | 6.94 | 2.58  | 45.11 | 49.76 |
| Tiao15 | 843.72--844.01  | 8.19 | 4.39  | 32.26 |       |
| Tiao15 | 843.98-844.00   | 5.52 | 4.89  | 32.95 | 60.25 |
| Tiao15 | 844.73--845.00  | 8.77 | 4.33  | 28.65 |       |
| Tiao15 | 845.68-845.70   | 5.8  | 4.32  | 35.25 | 58.36 |
| Tiao15 | 846.80--847.10  | 8.88 | 4.6   | 31.35 |       |
| Tiao15 | 847.10--847.40  | 8.52 | 4.82  | 29.7  |       |
| Tiao15 | 847.40--847.70  | 8.2  | 6.68  | 27.56 |       |
| Tiao15 | 847.70--848.00  | 8.79 | 5.88  | 29.3  |       |
| Tiao15 | 848.00--848.26  | 7.74 | 9.58  | 27.72 |       |
| Tiao15 | 848.41--848.69  | 7.76 | 9.82  | 26.93 |       |
| Tiao15 | 848.69--848.86  | 7.99 | 5.98  | 29.9  |       |
| Tiao15 | 848.98--849.10  | 8.47 | 5.42  | 32.92 |       |
| Tiao15 | 849.10--849.31  | 8.4  | 4     | 29.67 |       |
| Tiao15 | 851.06--851.20  | 8.89 | 3.24  | 35.99 |       |
| Tiao15 | 851.20--851.46  | 8.79 | 3.08  | 38.55 |       |
| Tiao15 | 851.46--851.71  | 8.69 | 2.94  | 38.15 |       |
| Tiao15 | 851.71--851.93  | 8.89 | 5.93  | 40.77 |       |
| Ma76   | 1800.4          | 3.71 | 29.47 | 4.17  | 62.66 |
| Ma76*  | 1805.74-1806.54 | 2.28 | 31.01 | 39.29 | 40.93 |
| Ma205  | 768.77-768.79   | 7.73 | 3.1   | 46.19 | 48.12 |

**Table S4.** Coalbed Methane Isotope Data (Tiaohu and Malang sags data from [46]; Surat Basin data from [66]; Bowen Basin data from [65]; Erlian Basin data from [67]).

| Basin/Sag   | Well ID  | Depth   | Sample ID        | $\delta C^{13}-(CH_4)$ ‰ | $C_1/(C_2+C_3)$ | $\delta D-(CH_4)$ ‰ | Data Source |      |
|-------------|----------|---------|------------------|--------------------------|-----------------|---------------------|-------------|------|
| Tiaohu sag  | Bei 2    | 1879.32 | B2-1             | -55.5                    | 117.65          | -215.6              | [46]        |      |
|             |          |         | B2-2             | -54.5                    | 117.65          | -215.2              |             |      |
|             |          |         | B2-3             | -54.1                    | 117.65          | -215.1              |             |      |
| Malang sag  | Ma 491   | 1489.00 | M491-1           | -63.6                    | 139.32          | -267.2              | [46]        |      |
|             |          |         | M491-2           | -64.1                    | 139.32          | -267.5              |             |      |
|             | Tang 1-5 | 1080.00 | T1-5-1           | -54.7                    | 2515.75         | -248.2              |             |      |
|             |          |         | T1-5-2           | -54.8                    | 2515.75         | -248.4              |             |      |
|             |          |         | T1-5-3           | -55.2                    | 2515.75         | -248                |             |      |
|             | Tang 1   | 993.00  | T1-1             | -54.8                    | 203.65          | -239.3              |             |      |
|             |          |         | T1-2             | -54.9                    | 203.65          | -239.1              |             |      |
|             |          |         | T1-3             | -55.3                    | 203.65          | -238.9              |             |      |
| Surat Basin |          |         |                  | -53.3                    | 9970            | -233                | [66]        |      |
|             |          |         |                  | -53.6                    | 9700            | -229                |             |      |
|             |          |         | Walloon Subgroup | -53.4                    | 9960            | -231                |             |      |
|             |          |         | Juandah          | -53.9                    | 190             | -227                |             |      |
|             |          |         | Coal             | -54.1                    | 9950            | -234                |             |      |
|             |          |         | Measures         | -55                      | 9940            | -236                |             |      |
|             |          |         |                  |                          | -54.5           | 706                 |             | -235 |
|             |          |         |                  |                          | -54             | 206                 |             | -232 |

|             |              |       |      |      |
|-------------|--------------|-------|------|------|
|             |              | -52.2 | 172  | -236 |
|             |              | -51.4 | 241  | -235 |
|             |              | -52.2 | 308  | -230 |
|             |              | -52.9 | 621  | -233 |
|             |              | -52.7 | 198  | -231 |
|             |              | -51.2 | 224  | -231 |
|             |              | -52.4 | 496  | -226 |
|             |              | -52.4 | 576  | -226 |
|             |              | -50.8 | 1655 | -223 |
|             |              | -52.1 | 496  | -222 |
|             |              | -51.8 | 1653 | -222 |
|             |              | -52.3 | 1976 | -221 |
|             |              | -53.1 | 210  | -225 |
|             |              | -54.7 | 1932 | -224 |
|             |              | -55.2 | 4981 | -221 |
|             |              | -54   | 9968 | -212 |
|             |              | -56   | 9970 | -202 |
|             |              | -55.2 | 9969 | -224 |
|             |              | -55.3 | 9962 | -223 |
|             |              | -51.9 | 4978 | -221 |
|             |              | -51.5 | 3320 | -225 |
|             | Desorption 2 | -51.3 | 1992 | -225 |
|             | Juandah      | -50.9 | 3317 | -227 |
|             | Coal         | -51.7 | 3318 | -223 |
| Surat Basin | Measures     | -49.2 | 3315 | -221 |
|             |              | -49.4 | 2486 | -219 |
|             |              | -49.9 | 3313 | -226 |
|             |              | -47.7 | 3315 | -224 |
|             |              | -47.8 | 1986 | -220 |
|             |              | -47.5 | 9944 | -213 |
|             |              | -48.5 | 3300 | -224 |
|             |              | -48.1 | 9924 | -222 |
|             |              | -58.5 | 311  | -202 |
|             |              | -54.3 | 354  | -203 |
|             |              | -53.6 | 1880 | -209 |
|             |              | -53.4 | 496  | -213 |
|             |              | -52.7 | 1984 | -208 |
|             |              | -53.9 | 1984 | -208 |
|             |              | -54   | 3303 | -210 |
|             |              | -53.2 | 3313 | -212 |
|             | Taroom Coal  | -52.2 | 2455 | -216 |
| Surat Basin | Measures     | -52.1 | 4960 | -213 |
|             |              | -51.7 | 3303 | -214 |
|             |              | -51.7 | 3303 | -216 |
|             |              | -50.9 | 3307 | -213 |
|             |              | -50.3 | 2478 | -213 |
|             |              | -49.3 | 1978 | -212 |
|             |              | -47.4 | 1982 | -216 |
|             |              | -46.8 | 1984 | -214 |
|             |              | -49.2 | 2475 | -216 |
|             |              | -47.3 | 1986 | -215 |
|             | Taroom Coal  | -50.1 | 149  | -215 |
| Surat Basin | Measures     | -51.1 | 116  | -214 |

|              |                                 |       |       |      |        |      |
|--------------|---------------------------------|-------|-------|------|--------|------|
| Bowen Basin  | Upper seam<br>north of fault    |       | -50.2 | 105  | -215   | [65] |
|              |                                 | 272.8 | -53.9 | 659  | -214   |      |
|              |                                 | 187.3 | -54.4 | 1585 | -212   |      |
|              | Upper seam<br>south of<br>fault | 332.3 | -56.6 |      | -212.1 |      |
|              |                                 | 176.6 | -56.7 |      | -212   |      |
|              |                                 | 118.7 | -56.6 |      | -212.2 |      |
|              | Lower seam<br>north of fault    | 208.1 | -56.3 |      | -207.5 |      |
|              |                                 | 332.9 | -62.2 |      | -209.6 |      |
|              |                                 | 237.5 | -48   |      | -205.4 |      |
|              | Lower seam<br>south of<br>fault | 411.4 | -56.7 |      | -212.7 |      |
|              |                                 | 227.5 | -58   |      | -215.8 |      |
|              |                                 | 107.5 | -54.3 |      | -211   |      |
|              |                                 | 280.8 | -58.9 |      | -211   |      |
|              |                                 |       | -61.7 |      | -214.7 |      |
|              |                                 |       | -56.6 |      | -207   |      |
| Erlian Basin |                                 |       | -62.5 | 1532 | -275   | [67] |
|              |                                 |       | -60.3 | 3035 | -270.2 |      |
|              |                                 |       | -60.1 | 2854 | -270.8 |      |

**Table S5.** Hydrogeological types and mineralization of coal seam water of Santanghu Basin (Structural units' data from [70], Well data from Research Institute of Exploration and Development, Petro China Tuha Oilfield Company). The data with \* in Well ID are the results of this study.

| Structural units/Well ID | Mineralization (mg/L) | Water chemical type                  | Hydrogeological type  | Data Source |
|--------------------------|-----------------------|--------------------------------------|-----------------------|-------------|
| Kumusu sag               | 1800-3400             | Na-Cl-SO <sub>4</sub>                | confined weak runoff  | [70]        |
| Hanshuiquan sag          | 1400-3100             | Na-Cl-SO <sub>4</sub>                | confined weak runoff  | [70]        |
| Tiaohu sag               | 2400-5000             | Na-Cl-SO <sub>4</sub>                | open local stagnation | [70]        |
| Malang sag               | 1000-5000             | Na-HCO <sub>3</sub> -SO <sub>4</sub> | open local stagnation | [70]        |
| Naomaohu sag             | 1000-3000             | Na-Cl-SO <sub>4</sub>                | confined weak runoff  | [70]        |
| Ma 18*                   | 3882                  | HCO <sub>3</sub> -Na                 |                       |             |
| Ma 206*                  | 5625-5657             | Na <sub>2</sub> SO <sub>4</sub>      |                       |             |
| Ma 214*                  | 3827                  | NaHCO <sub>3</sub>                   |                       |             |
| Ma 208*                  | 3880                  | NaHCO <sub>3</sub>                   |                       |             |
| Ma 209*                  | 3155                  | NaHCO <sub>3</sub>                   |                       |             |
| Ma 203*                  | 1160                  | Na <sub>2</sub> SO <sub>4</sub>      |                       |             |
| Ma 205*                  | 4778                  | NaHCO <sub>3</sub>                   |                       |             |
| Ma 202*                  | 2241                  | Na <sub>2</sub> SO <sub>4</sub>      |                       |             |
| Ma 201*                  | 2382                  | NaHCO <sub>3</sub>                   |                       |             |
| Xi 9-13*                 | 2398                  | NaHCO <sub>3</sub>                   |                       |             |
| Xi 9-11*                 | 2865                  | NaHCO <sub>3</sub>                   |                       |             |
